# Supplementary material for: Androgen Receptor Gene CAG Repeat Length Varies and Affects Semen Quality in an Ethnic-Specific Fashion in Young Men from Russia
Source: MDPI journal article supplement (doi:10.3390/ijms231810594), 2022-09-13
Supplement: s1 [file s1]

**Table S1. Frequency distribution of the CAG repeats in the entire Russian study population and subgroups with normal and impaired semen quality**

| No. of CAG repeats | Entire study population<br>(n = 1313) |               | Normal semen quality<br>(n = 739) |               | Impaired semen quality<br>(n = 574) |               |
|--------------------|---------------------------------------|---------------|-----------------------------------|---------------|-------------------------------------|---------------|
|                    | No.                                   | Frequency (%) | No.                               | Frequency (%) | No.                                 | Frequency (%) |
| 6                  | 1                                     | 0.1           | 1                                 | 0.1           |                                     |               |
| 7                  | 1                                     | 0.1           | 1                                 | 0.1           |                                     |               |
| 8                  | 1                                     | 0.1           |                                   |               | 1                                   | 0.2           |
| 9                  |                                       |               |                                   |               |                                     |               |
| 10                 |                                       |               |                                   |               |                                     |               |
| 11                 | 1                                     | 0.1           | 1                                 | 0.1           |                                     |               |
| 12                 | 1                                     | 0.1           |                                   |               | 1                                   | 0.2           |
| 13                 | 1                                     | 0.1           | 1                                 | 0.1           |                                     |               |
| 14                 | 2                                     | 0.2           | 1                                 | 0.1           | 1                                   | 0.2           |
| 15                 | 5                                     | 0.4           | 4                                 | 0.5           | 1                                   | 0.2           |
| 16                 | 2                                     | 0.2           |                                   |               | 2                                   | 0.3           |
| 17                 | 7                                     | 0.5           | 6                                 | 0.8           | 1                                   | 0.2           |
| 18                 | 17                                    | 1.3           | 13                                | 1.7           | 4                                   | 0.7           |
| 19                 | 56                                    | 4.2           | 45                                | 6.0           | 11                                  | 1.9           |
| 20                 | 111                                   | 8.4           | 68                                | 9.1           | 43                                  | 7.5           |
| 21                 | 133                                   | 10.0          | 78                                | 10.4          | 55                                  | 9.5           |
| <b>22</b>          | <b>207</b>                            | <b>15.6</b>   | <b>115</b>                        | <b>15.4</b>   | <b>92</b>                           | <b>15.9</b>   |
| 23                 | 137                                   | 10.3          | 72                                | 9.6           | 65                                  | 11.3          |
| 24                 | 141                                   | 10.6          | 72                                | 9.6           | 69                                  | 12.0          |
| 25                 | 173                                   | 13.1          | 103                               | 13.8          | 70                                  | 12.1          |
| 26                 | 121                                   | 9.1           | 60                                | 8.0           | 61                                  | 10.6          |
| 27                 | 76                                    | 5.7           | 44                                | 5.9           | 32                                  | 5.5           |
| 28                 | 32                                    | 2.4           | 17                                | 2.3           | 15                                  | 2.6           |
| 29                 | 23                                    | 1.7           | 11                                | 1.5           | 12                                  | 2.1           |
| 30                 | 32                                    | 2.4           | 13                                | 1.7           | 19                                  | 3.3           |

|    |    |     |   |     |    |     |
|----|----|-----|---|-----|----|-----|
| 31 | 16 | 1.2 | 6 | 0.8 | 10 | 1.7 |
| 32 | 8  | 0.6 | 3 | 0.4 | 5  | 0.9 |
| 33 | 3  | 0.2 | 1 | 0.1 | 2  | 0.3 |
| 34 | 1  | 0.1 |   |     | 1  | 0.2 |
| 35 |    |     |   |     |    |     |
| 36 | 3  | 0.2 | 3 | 0.4 |    |     |
| 37 |    |     |   |     |    |     |
| 38 |    |     |   |     |    |     |
| 39 | 1  | 0.1 |   |     | 1  | 0.2 |

Note. No. - Number of each allele for a particular semen quality group; frequency - a percent of cases in relation to the respective number of participants within the group.

**Table S2. Frequency distribution of the CAG repeats in the Slavic, Buryat and Yakut ethnic subgroups**

| No. of CAG repeats | Slavs (n = 697) |               | Buryats (n = 208) |               | Yakuts (n = 134) |               |
|--------------------|-----------------|---------------|-------------------|---------------|------------------|---------------|
|                    | n               | Frequency (%) | n                 | Frequency (%) | n                | Frequency (%) |
| 6                  |                 |               |                   |               |                  |               |
| 7                  | 1               | 0.1           |                   |               |                  |               |
| 8                  | 1               | 0.1           |                   |               |                  |               |
| 9                  |                 |               |                   |               |                  |               |
| 10                 |                 |               |                   |               |                  |               |
| 11                 |                 |               | 1                 | 0.5           |                  |               |
| 12                 |                 |               |                   |               |                  |               |
| 13                 |                 |               |                   |               |                  |               |
| 14                 | 1               | 0.1           |                   |               |                  |               |
| 15                 | 3               | 0.4           |                   |               |                  |               |
| 16                 | 1               | 0.1           | 1                 | 0.5           |                  |               |
| 17                 | 3               | 0.4           | 2                 | 1.0           |                  |               |
| 18                 | 11              | 1.6           | 2                 | 1.0           | 1                | 0.7           |
| 19                 | 38              | 5.4           | 12                | 5.7           | 1                | 0.7           |
| 20                 | 77              | 10.9          | 9                 | 4.3           | 4                | 3.0           |
| 21                 | 86              | 12.2          | 21                | 10.0          | 4                | 3.0           |
| <b>22</b>          | <b>115</b>      | <b>16.3</b>   | <b>27</b>         | <b>12.9</b>   | 16               | 11.9          |
| 23                 | 75              | 10.7          | 22                | 10.5          | 13               | 9.7           |
| 24                 | 75              | 10.7          | 24                | 11.5          | 13               | 9.7           |
| <b>25</b>          | 80              | 11.4          | 23                | 11.0          | <b>29</b>        | <b>21.6</b>   |
| 26                 | 51              | 7.2           | 22                | 10.5          | 23               | 17.2          |
| 27                 | 29              | 4.1           | 17                | 8.1           | 12               | 9.0           |
| 28                 | 15              | 2.1           | 7                 | 3.3           | 4                | 3.0           |
| 29                 | 7               | 1.0           | 6                 | 2.9           | 6                | 4.5           |
| 30                 | 19              | 2.7           | 5                 | 2.4           |                  |               |
| 31                 | 4               | 0.6           | 3                 | 1.4           | 5                | 3.7           |

|    |   |     |   |     |   |     |
|----|---|-----|---|-----|---|-----|
| 32 | 2 | 0.3 | 1 | 0.5 | 3 | 2.2 |
| 33 | 1 | 0.1 |   |     |   |     |
| 34 | 1 | 0.1 |   |     |   |     |
| 35 |   |     |   |     |   |     |
| 36 | 1 | 0.1 | 2 | 1.0 |   |     |
| 37 |   |     |   |     |   |     |
| 38 |   |     |   |     |   |     |
| 39 |   |     | 1 | 0.5 |   |     |

Note. No. - Number of each allele for a particular semen quality group; frequency - a percent of cases in relation to the respective number of participants within the group.

### Testing for AZF deletions of the Y-chromosome.

AZF deletions are direct causes of oligozoospermia or azoospermia. Identification of AZF deletions was performed using 13 STS markers and real-time multiplex PCR. Commercial kits “RealBest-Genetics AZF microdeletions” (“AO Vector-Best”, Novosibirsk) were used. The 13 STS markers were as follows: sY134, sY84, sY254, sY127, sY86, sY255, sY142, sY615, sY1191, sY1196, sY1206, sY1125, sY1296 (Figure).

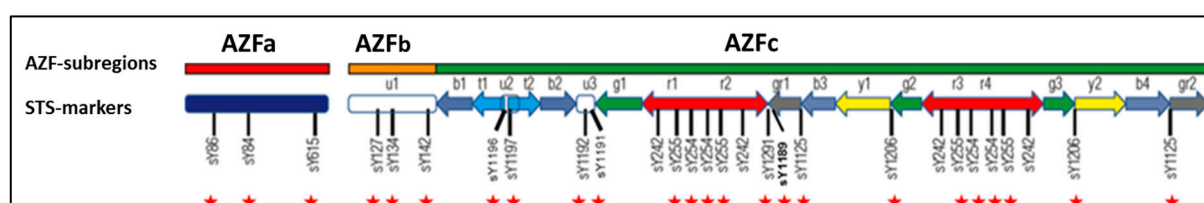

Figure S1. Schematic representation of the AZF locus and the main STS markers, an asterisk marks the STS markers used.
